# Supplementary material
Source: Springer Nature journal article supplement (https://www.springermedizin.de/resource/supplementary/12889_2010_3074_MOESM1_ESM.pdf/9488154)

**Approximate Distances  
Along Direct Routes  
From WTC Site To:**

|                          |            |
|--------------------------|------------|
| 59th Street Disposal     | 5.0 Miles  |
| Pier 25                  | 1.5 Miles  |
| Pier 6                   | 1.0 Miles  |
| Hamilton Marine Transfer | 4.0 Miles  |
| Fresh Kills              | 20.0 Miles |

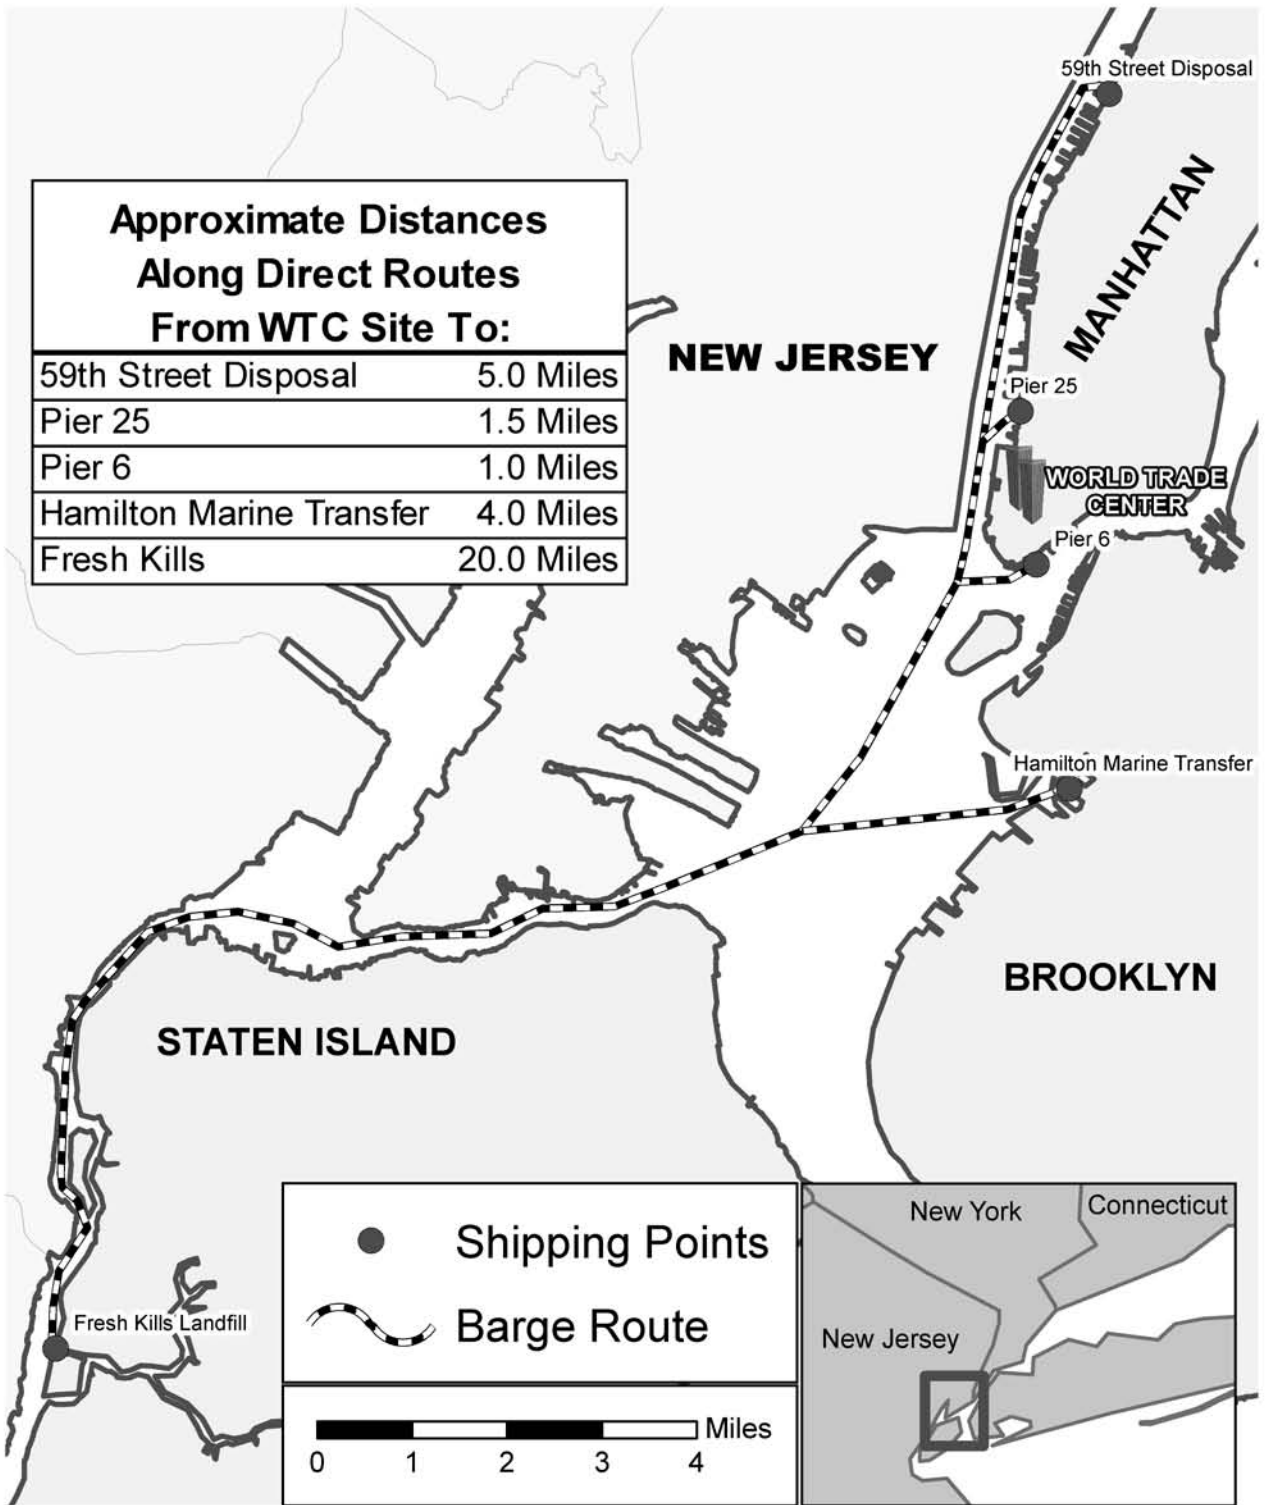

Supplement: MOESM1 [file 9488154]
